# Supplementary material
Source: PubMed Central journal article supplement (PMC3375343)
Supplement: NIHMS379310-supplement-1_si_001.pdf [file NIHMS379310-supplement-1_si_001.pdf]

## Supporting Information

### Antitumor Agents 293. Non-toxic Dimethyl-4,4'-dimethoxy-5,6,5',6'- dimethylenedioxybiphenyl-2,2'-dicarboxylate (DDB) Analogues Chemosensitize Multidrug Resistant Cancer Cells to Clinical Anti-cancer Drugs

Hsin-Yi Hung,<sup>†</sup> Emika Ohkoshi,<sup>†</sup> Kenneth F. Bastow,<sup>‡</sup> Kyoko Nakagawa-Goto,<sup>†\*</sup> Kuo-Hsiung

Lee<sup>†\*§</sup>

<sup>†</sup> *Natural Products Research Laboratories, Eshelman School of Pharmacy, University of North Carolina, Chapel Hill, North Carolina 27599-7568*

<sup>‡</sup> *Division of Chemical Biology & Medicinal Chemistry, Eshelman School of Pharmacy, University of North Carolina, Chapel Hill, North Carolina 27599-7568*

<sup>§</sup> *Chinese Medicine Research and Development Center, China Medical University and Hospital, Taichung, Taiwan*

#### Table of Contents

|                                                                                                                                                |    |
|------------------------------------------------------------------------------------------------------------------------------------------------|----|
| Cytotoxicity of DDB analogs -----                                                                                                              | S2 |
| IC <sub>50</sub> ± Standard deviation (SD) for reversal effects with paclitaxel (TAX), vincristine (VCR), and doxorubicin (DOX) in KBvin ----- | S2 |
| Standardized P values of compounds <b>6</b> , <b>23</b> , and VRP-----                                                                         | S3 |
| Effect of compounds <b>6</b> and <b>23</b> on P-gp function in KBvin cells-----                                                                | S3 |

**Table S1.** Cytotoxicity of DDB analogs

| Cmpd                   | IC <sub>50</sub> (μM) <sup>a</sup> |        |        |           |
|------------------------|------------------------------------|--------|--------|-----------|
|                        | A549                               | DU145  | KB     | KBvin     |
| <b>1-5</b>             | >100                               | >100   | >100   | >100      |
| <b>6</b>               | 98                                 | >100   | >100   | >100      |
| <b>7-27</b>            | >100                               | >100   | >100   | >100      |
| <b>28</b>              | 45                                 | >100   | 88     | 71        |
| <b>29-31</b>           | >100                               | >100   | >100   | >100      |
| <b>32</b>              | >10                                | >10    | >10    | >10       |
| <b>33-36</b>           | >100                               | >100   | >100   | >100      |
| <b>TAX<sup>b</sup></b> | 7.0 nM                             | 2.9 nM | 1.2 nM | 1290.9 nM |
| <b>VRP<sup>c</sup></b> | 97.9                               | >100   | 49.2   | 77.2      |

<sup>a</sup> Antiproliferative activity as IC<sub>50</sub> values for each cell line, the concentration of compound that caused 50% reduction in absorbance at 562 nm relative to untreated cells using the sulforhodamine B assay. Human lung carcinoma (A549), prostate cancer (DU145), epidermoid carcinoma of the nasopharynx (KB), and MDR expressing P-glycoprotein (KBvin). All compounds, besides **28** and **32**, exhibited no cytotoxicity. <sup>b</sup>Paclitaxel <sup>c</sup>Verapamil

**Table S2.** IC<sub>50</sub> ± SD for reversal effects with paclitaxel (TAX), vincristine (VCR), and doxorubicin (DOX) in KBvin

| Cmpd <sup>a</sup> | IC <sub>50</sub> of TAX (nM) | IC <sub>50</sub> of VCR (nM) | IC <sub>50</sub> of DOX (nM) |
|-------------------|------------------------------|------------------------------|------------------------------|
|                   | 976.8 ± 163.4                | 2520.7 ± 719.4               | 1942.3 ± 404.1               |
| <b>4</b>          | 82.93 ± 14.05                | 80.96 ± 4.69                 | 507.5 ± 8.6                  |
| <b>5</b>          | 46.52 ± 9.19                 | 41.42 ± 8.35                 | 284.0 ± 55.3                 |
| <b>6</b>          | 26.15 ± 4.29                 | 7.22 ± 0.75                  | 42.6 ± 4.6                   |
| <b>7</b>          | 30.50 ± 3.22                 | 50.81 ± 9.72                 | 510.9 ± 55.9                 |
| <b>8</b>          | 37.06 ± 5.95                 | 35.92 ± 7.71                 | 93.9 ± 12.2                  |
| <b>9</b>          | 8.72 ± 2.07                  | 31.75 ± 8.38                 | 339.7 ± 62.5                 |
| <b>10</b>         | 40.74 ± 7.75                 | 15.65 ± 2.43                 | 221.5 ± 50.8                 |
| <b>11</b>         | 39.11 ± 3.06                 | 47.31 ± 8.67                 | 61.9 ± 4.7                   |
| <b>13</b>         | 48.65 ± 6.82                 | 8.14 ± 1.13                  | 86.3 ± 8.4                   |
| <b>14</b>         | 39.89 ± 2.65                 | 10.55 ± 0.52                 | 65.8 ± 15.9                  |
| <b>15</b>         | 9.55 ± 1.96                  | 10.98 ± 0.63                 | 547.8 ± 105.8                |
| <b>16</b>         | 2.99 ± 0.21                  | 4.50 ± 0.19                  | 291.5 ± 1.5                  |
| <b>17</b>         | 47.45 ± 8.29                 | 46.53 ± 0.81                 | 573.9 ± 38.1                 |
| <b>19</b>         | 7.65 ± 0.96                  | 20.21 ± 3.34                 | 157.7 ± 13.9                 |
| <b>20</b>         | 46.82 ± 4.81                 | 39.61 ± 4.61                 | 130.8 ± 10.5                 |
| <b>21</b>         | 47.23 ± 2.04                 | 40.53 ± 1.03                 | 131.4 ± 7.3                  |
| <b>22</b>         | 14.25 ± 4.41                 | 10.10 ± 0.92                 | 68.80 ± 1.43                 |
| <b>23</b>         | 4.41 ± 0.89                  | 4.45 ± 0.84                  | 84.2 ± 14.6                  |
| <b>VRP</b>        | 31.87 ± 7.20                 | 23.04 ± 4.78                 | 219 ± 57.0                   |

**Table S3.** Standardized P values of compounds **6**, **23**, and VRP.

| Concentration ( $\mu\text{M}$ ) | <b>6</b>                    |         | <b>23</b>                   |         | VRP                         |         |
|---------------------------------|-----------------------------|---------|-----------------------------|---------|-----------------------------|---------|
|                                 | Cell viability <sup>a</sup> | P value | Cell viability <sup>a</sup> | P value | Cell viability <sup>a</sup> | P value |
| 20                              | 16.5 $\pm$ 4.8              | <0.001  | 14.9 $\pm$ 8.2              | <0.001  | 13.0 $\pm$ 10.0             | 0.002   |
| 10                              | 22.0 $\pm$ 3.5              | 0.004   | 22.3 $\pm$ 5.2              | 0.001   | 23.9 $\pm$ 12.0             | 0.002   |
| 5                               | 30.7 $\pm$ 2.6              | 0.007   | 25.9 $\pm$ 5.7              | 0.008   | 32.4 $\pm$ 10.4             | 0.005   |
| 3                               | 47.0 $\pm$ 7.5              | 0.022   | 29.8 $\pm$ 4.8              | 0.002   | 45.8 $\pm$ 16.2             | 0.023   |
| 1                               | 98.7 $\pm$ 5.7              | 0.294   | 76.6 $\pm$ 17.4             | 0.098   | 91.2 $\pm$ 21/3             | 0.426   |
| 0.1                             | 112.5 $\pm$ 11.8            | 0.086   | 105.3 $\pm$ 15.1            | 0.112   | 103.7 $\pm$ 11.2            | 0.207   |

<sup>a</sup> Cell viability was presented by percentage of cell viability  $\pm$  SD. P value was calculated for each concentration.

**Table S4.** Effect of compounds on P-gp function in KBvin cells

| Compound         | Concentration ( $\mu\text{M}$ ) |                 |                 |                 |                  |
|------------------|---------------------------------|-----------------|-----------------|-----------------|------------------|
|                  | 0.1                             | 0.3             | 0.5             | 1               | 5                |
| <b>6</b>         | 4.6 $\pm$ 0.15                  | 5.27 $\pm$ 0.38 | 5.68 $\pm$ 0.72 | 6.37 $\pm$ 0.2  | 9.43 $\pm$ 0.04  |
| <b>23</b>        | 5.66 $\pm$ 0.22                 | 6.66 $\pm$ 0.31 | 8.16 $\pm$ 0.62 | 12.6 $\pm$ 1.25 | 21.44 $\pm$ 1.95 |
| <b>Verapamil</b> | 4.69 $\pm$ 0.18                 | 5.37 $\pm$ 0.07 | 5.78 $\pm$ 1.19 | 7.7 $\pm$ 1.3   | 12.65 $\pm$ 2.36 |

Cellular accumulation of calcein is represented by the relative fluorescent unit ( $\times 10^4$  RFU). Data are expressed as mean  $\pm$  SD of three independent experiments.
